# Supplementary material
Source: Springer Nature journal article supplement (https://www.springermedizin.de/resource/supplementary/12880_2013_211_MOESM2_ESM.pdf/9450312)

**A**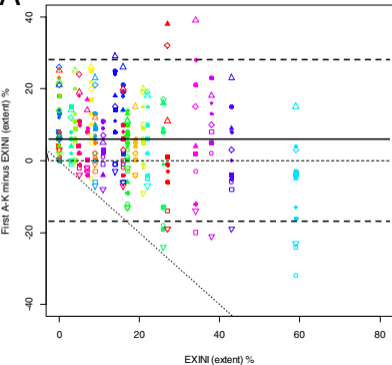**B**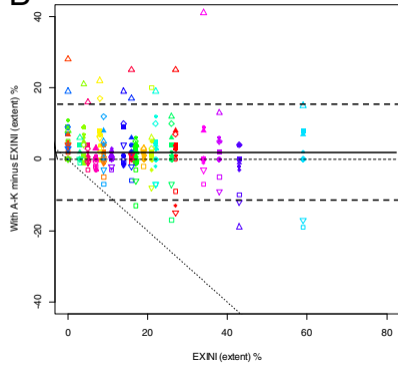**C**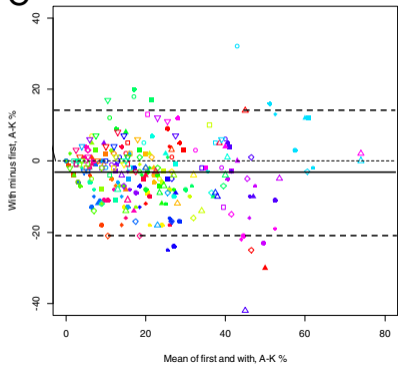

Supplement: MOESM2 [file 9450312]
